# Supplementary material for: In Silico Genome-Wide Analysis of the ATP-Binding Cassette Transporter Gene Family in Soybean (Glycine max L.) and Their Expression Profiling
Source: Biomed Res Int. 2019 Jan 10;2019:8150523. doi: 10.1155/2019/8150523 (PMC6350567; doi:10.1155/2019/8150523)
Supplement: Supplementary 4 — TABLE S1: List of GmABC transporter genes identified and their basic physical properties. [file 8150523.f4.xls]

## Sheet: Sheet1
TABLE S1. List of GmABC transporter genes identified and their basic physical properties.
Gene (Glyma.Wm82.a2.v1)	Gene Start (bp)	Gene End (bp)	Chromosome No.	Strand	No. of introns	Length (aa)	Mol. Wt. (kDa)	pI	Subfamily	Description	Domain Organization
Glyma.01G008200	802095	812507	Chr01	1	8	1241	136.26	8.8	ABCB	ABC transporter B family member 8	TMD-NBD-TMD-NBD
Glyma.01G016500	1573790	1583422	Chr01	1	11	1246	136.43	8.84	ABCB	ABC transporter B family member 2-like	TMD-NBD-TMD-NBD
Glyma.01G020000	1990783	1994783	Chr01	1	2	671	75.04	9.15	ABCG	ABC transporter G family member 6-like	NBD-TMD
Glyma.01G026000	2732449	2740742	Chr01	-1	17	701	77.96	9.08	ABCB	ABC transporter B family member chloroplastic isoform X1	TMD-NBD
Glyma.01G091100	27547798	27553665	Chr01	1	4	678	75.88	8.41	ABCG	ABC transporter G family member 21-like	NBD-TMD
Glyma.01G154400	49163868	49167142	Chr01	-1	4	659	74.17	8.61	ABCG	ABC transporter G family member 14	NBD-TMD
Glyma.01G199500	53326917	53328543	Chr01	1	4	300	33.41	6.79	ABCI	Chloroplastic,Protein ABCI7	CYT domain
Glyma.02G008000	822822	829313	Chr02	-1	11	1282	138.3	6.97	ABCB	ABC transporter B family member 21-like	TMD-NBD-TMD-NBD
Glyma.02G038800	3618925	3626387	Chr02	1	17	701	77.92	8.44	ABCB	ABC transporter B family member chloroplastic isoform X1	TMD-NBD
Glyma.02G094800	8502025	8511131	Chr02	-1	10	1402	155.29	6.58	ABCB	ABC transporter B family member 20-like	TMD-NBD-TMD-NBD
Glyma.02G130600	13410565	13415621	Chr02	-1	5	684	76.3	8.43	ABCG	ABC transporter G family member 21-like	NBD-TMD
Glyma.02G159900	17794585	17817213	Chr02	-1	19	1480	168.29	7.4	ABCG	Pleiotropic drug resistance 2-like isoform X1	NBD-TMD-NBD-TMD
Glyma.02G163200	21700163	21724365	Chr02	-1	13	874	98.08	9.63	ABCG	ABC transporter G family member 24-like isoform X1	NBD-TMD
Glyma.02G188300	35008552	35027979	Chr02	-1	9	743	82.27	9.15	ABCG	ABC transporter G family member 22-like isoform X1	NBD-TMD
Glyma.02G226400	41334387	41337191	Chr02	1	5	274	30.96	8.77	ABCG	ABC transporter G family member 31-like	NBD-TMD
Glyma.02G238300	42672255	42689914	Chr02	-1	17	748	81.53	9.82	ABCB	ABC transporter B family member mitochondrial	TMD-NBD
Glyma.02G275800	45878182	45879169	Chr02	-1	2	188	20.76	6.23	ABCI	Trigalactosyldiacylglycerol chloroplastic-like	MlaD
Glyma.02G298300	47557607	47562087	Chr02	-1	6	1227	136.79	6.66	ABCC	ABC transporter C family member 3-like	TMD-NBD-TMD
Glyma.02G298400	47564697	47571222	Chr02	-1	9	1493	166.32	6.51	ABCC	ABC transporter C family member 3-like	TMD-NBD-TMD-NBD
Glyma.02G298500	47580167	47586555	Chr02	-1	9	1493	166.45	6.55	ABCC	ABC transporter C family member 3-like	TMD-NBD-TMD-NBD
Glyma.02G302200	47775833	47779744	Chr02	1	8	686	77.69	8.29	ABCG	ABC transporter G family member 26-like	NBD-TMD
Glyma.03G083800	23353260	23356556	Chr03	-1	6	717	80.6	7.69	ABCC	ABC transporter C family member 3-like isoform X1	NBD-TMD
Glyma.03G101000	28992737	29004388	Chr03	-1	9	1522	170.72	7.63	ABCC	ABC transporter C family member 15	TMD-NBD-TMD-NBD
Glyma.03G135200	35070964	35078620	Chr03	1	8	661	74.25	8.46	ABCG	ABC transporter G family member 15-like	NBD-TMD
Glyma.03G135300	35092248	35097578	Chr03	1	6	434	48.07	6.5	ABCG	ABC transporter G family member 15-like	NBD-TMD
Glyma.03G135400	35102729	35105722	Chr03	1	3	294	31.8	6.4	ABCG	ABC transporter G family member 15-like	NBD-TMD
Glyma.03G136000	35138670	35188160	Chr03	-1	38	1826	203.97	7.15	ABCA	ABC transporter A family member 1 isoform X1	TMD-NBD-TMD-NBD
Glyma.03G167800	38202353	38210883	Chr03	-1	10	1539	170.98	7.03	ABCC	ABC transporter C family member 5-like	TMD-NBD-TMD-NBD
Glyma.03G168000	38228103	38236161	Chr03	-1	23	1445	162.49	9.2	ABCG	PDR-like ABC-transporter	NBD-TMD-NBD-TMD
Glyma.03G168100	38238646	38248633	Chr03	-1	23	1242	140.23	7.51	ABCG	Pleiotropic drug resistance 1	NBD-TMD-NBD-TMD
Glyma.03G168200	38250857	38270587	Chr03	-1	23	1442	163.04	9.12	ABCG	Pleiotropic drug resistance 1	NBD-TMD-NBD-TMD
Glyma.03G175300	38882750	38885412	Chr03	1	0	734	81.61	9.7	ABCG	ABC transporter G family member 20	NBD-TMD
Glyma.03G183600	39553303	39559880	Chr03	-1	9	1342	146.78	7.29	ABCB	ABC transporter B family member 1	TMD-NBD-TMD-NBD
Glyma.03G192500	40342629	40346318	Chr03	-1	8	625	71.04	8.38	ABCG	ABC transporter G family member 39	NBD-TMD
Glyma.03G192600	40346535	40352174	Chr03	-1	10	808	92.47	9.33	ABCG	ABC transporter G family member 39	TMD-NBD-TMD-NBD
Glyma.03G192700	40354675	40364503	Chr03	-1	19	1431	164.34	9.01	ABCG	Plant PDR ABC transporter	NBD-TMD-NBD-TMD
Glyma.03G192800	40368418	40374308	Chr03	-1	2	244	26.45	6.52	ABCG	ABC transporter G family member 39	NBD-TMD
Glyma.03G204800	41281503	41290883	Chr03	-1	9	740	81.53	8.97	ABCG	ABC transporter G family member 22 isoform X1	NBD-TMD
Glyma.03G214000	41890634	41892316	Chr03	1	7	265	29.72	5.83	ABCC	ABC transporter C family member 4-like	TMD-NBD
Glyma.03G224100	42643290	42649228	Chr03	1	11	1283	139.5	8.24	ABCB	ABC transporter B family member 21-like	TMD-NBD-TMD-NBD
Glyma.04G069800	5826885	5834654	Chr04	1	23	1449	163.93	7.89	ABCG	Pleiotropic drug resistance 1	NBD-TMD-NBD-TMD
Glyma.04G126500	17010198	17015041	Chr04	1	5	624	70.03	6.12	ABCC	ABC transporter C family member 12-like	TMD-NBD
Glyma.04G145300	26679172	26679584	Chr04	1	1	104	11.87	6.77	ABCG	ABC transporter G family member 11	NBD-TMD
Glyma.04G172400	43033133	43035449	Chr04	1	4	210	23.29	5.23	ABCI	Chloroplastic isoform X2, Protein ABCI7	CYT domain
Glyma.04G172900	43255215	43261602	Chr04	-1	14	949	106.6	7.69	ABCA	ABC transporter A family member 7	TMD-NBD
Glyma.04G173000	43281745	43287505	Chr04	1	15	962	106.87	8.38	ABCA	ABC transporter A family member 2	TMD-NBD
Glyma.04G211800	48371249	48373171	Chr04	-1	0	640	71.91	8.8	ABCG	ABC transporter G family member 5-like	NBD-TMD
Glyma.04G218900	48988587	48993895	Chr04	-1	8	696	78.39	5.74	ABCF	ABC transporter F family member 5	NBD-NBD
Glyma.05G011900	1081225	1092755	Chr05	-1	23	1418	161.83	8.88	ABCG	ABC transporter G family member 32	NBD-TMD-NBD-TMD
Glyma.05G019400	1724030	1730486	Chr05	1	16	633	68.59	8.75	ABCB	ABC transporter B family member 25	TMD-NBD
Glyma.05G028500	2449777	2459772	Chr05	-1	17	949	105.88	8.08	ABCA	ABC transporter A family member 7-like isoform X2	TMD-NBD
Glyma.05G145000	33892148	33898499	Chr05	1	9	1452	163.02	6.75	ABCC	ABC transporter C family member 15	TMD-NBD-TMD-NBD
Glyma.05G178900	36683487	36704652	Chr05	-1	24	1338	150.08	9.64	ABCD	ABC transporter D family member 1-like	TMD-NBD-TMD-NBD
Glyma.05G192700	37794071	37796377	Chr05	1	0	649	72.65	7.53	ABCG	ABC transporter G family member 5-like	NBD-TMD
Glyma.05G221600	40107183	40110738	Chr05	-1	3	289	31.67	6.52	ABCI	ABC transporter I family member chloroplastic	NBD
Glyma.05G247100	42056899	42060058	Chr05	1	3	799	89.94	9.04	ABCG	ABC transporter G family member 18-like	NBD-TMD
Glyma.06G071800	5480586	5488550	Chr06	1	23	1448	163.9	8.03	ABCG	Pleiotropic drug resistance 1	NBD-TMD-NBD-TMD
Glyma.06G139500	11374542	11383558	Chr06	-1	9	1254	137.46	8.1	ABCB	ABC transporter B family member 19-like	TMD-NBD-TMD-NBD
Glyma.06G146900	11976434	11981407	Chr06	1	8	691	77.89	5.62	ABCF	ABC transporter F family member 5	NBD-NBD
Glyma.06G153500	12528888	12532196	Chr06	1	5	266	29.03	7.03	ABCI	ABC transporter I family member chloroplastic isoform X1	NBD
Glyma.06G154500	12600307	12602169	Chr06	1	0	620	69.68	9.03	ABCG	ABC transporter G family member 5-like	NBD-TMD
Glyma.06G189300	16531630	16532022	Chr06	1	1	94	9.97	7.91	ABCB	ABC transporter B family member 21	TMD-NBD
Glyma.06G191300	16805742	16812503	Chr06	-1	15	967	107.01	7.93	ABCA	ABC transporter A family member 2	TMD-NBD
Glyma.06G191400	16822277	16831510	Chr06	1	16	807	90.49	8.15	ABCA	ABC transporter A family member 7	TMD-NBD
Glyma.06G248800	41998757	42002205	Chr06	1	3	624	69.57	9.68	ABCG	ABC transporter G family member 9-like	NBD-TMD
Glyma.06G269300	45811991	45819134	Chr06	-1	6	1248	137.2	8.8	ABCB	Multidrug resistance	TMD-NBD-TMD-NBD
Glyma.06G312300	50073336	50088452	Chr06	1	26	1615	181.98	6.88	ABCC	ABC transporter C family member 12-like	TMD-NBD-TMD-NBD
Glyma.07G011500	879557	882132	Chr07	1	7	557	62.26	5.13	ABCC	ABC transporter C family member 8-like	TMD-NBD
Glyma.07G011600	885910	891586	Chr07	1	10	1464	163.97	6.93	ABCC	ABC transporter C family member 8-like	TMD-NBD-TMD-NBD
Glyma.07G015800	1258348	1267593	Chr07	-1	21	1482	167.77	8.02	ABCG	ABC transporter G family member 36-like	NBD-TMD-NBD-TMD
Glyma.07G016200	1305407	1310942	Chr07	-1	15	951	107.73	6.98	ABCG	Pleiotropic drug resistance 1-like	NBD-TMD-NBD-TMD
Glyma.07G033500	2619614	2627010	Chr07	1	20	1426	161.35	8.08	ABCG	Pleiotropic drug resistance 1-like	NBD-TMD-NBD-TMD
Glyma.07G081000	7423408	7424268	Chr07	-1	2	150	16.94	9.24	ABCB	ABC transporter B family member 15-like	TMD-NBD
Glyma.07G121900	14251035	14268964	Chr07	1	10	1517	170.05	7.52	ABCC	ABC transporter C family member 15	TMD-NBD-TMD-NBD
Glyma.07G231400	41213292	41215492	Chr07	1	0	655	73.78	8.44	ABCG	ABC transporter G family member 23	NBD-TMD
Glyma.07G233900	41504876	41514290	Chr07	1	23	1437	162.65	8.23	ABCG	Pleiotropic drug resistance 3-like isoform X2	NBD-TMD-NBD-TMD
Glyma.07G234000	41514655	41518118	Chr07	-1	11	504	56.99	6.94	ABCG	Pleiotropic drug resistance 3	NBD-TMD
Glyma.08G000800	62176	64140	Chr08	1	0	654	73.14	7.99	ABCG	ABC transporter G family member 5-like	NBD-TMD
Glyma.08G028100	2249961	2252478	Chr08	-1	3	289	31.71	6.52	ABCI	ABC transporter I family member chloroplastic	NBD
Glyma.08G055000	4239257	4240701	Chr08	1	2	260	28.32	5.68	ABCI	ABC transporter I family member 17	NBD
Glyma.08G055500	4269457	4272267	Chr08	1	3	794	89.32	8.24	ABCG	ABC transporter G family member 18-like	NBD-TMD
Glyma.08G070700	5386384	5393446	Chr08	1	8	565	62.94	8.34	ABCG	ABC transporter G family member 11	NBD-TMD
Glyma.08G070800	5402843	5409262	Chr08	1	7	623	69.3	7.36	ABCG	ABC transporter G family member 11	NBD-TMD
Glyma.08G070900	5412358	5416024	Chr08	1	7	678	75.33	7.81	ABCG	ABC transporter G family member 11	NBD-TMD
Glyma.08G071000	5416951	5421140	Chr08	-1	6	641	71.11	8.81	ABCG	ABC transporter G family member 11-like	NBD-TMD
Glyma.08G071100	5423830	5429150	Chr08	-1	7	699	77.33	8.42	ABCG	ABC transporter G family member 11	NBD-TMD
Glyma.08G071200	5438765	5446150	Chr08	-1	7	695	77.37	7.66	ABCG	ABC transporter G family member 2-like	NBD-TMD
Glyma.08G101500	7801199	7808033	Chr08	1	9	1455	163.58	8.04	ABCC	ABC transporter C family member 15	TMD-NBD-TMD-NBD
Glyma.08G101700	7809420	7812331	Chr08	-1	1	190	21.41	5.57	ABCC	ABC transporter C family member 15	TMD-NBD
Glyma.08G136400	10421301	10439165	Chr08	-1	24	1338	150.07	9.46	ABCD	ABC transporter D family member 1-like	TMD-NBD-TMD-NBD
Glyma.08G160900	12447956	12454558	Chr08	1	10	789	88.82	5.78	ABCD	ABC transporter D family member chloroplastic isoform X1	TMD-NBD
Glyma.08G190700	15335984	15342272	Chr08	-1	11	1460	163.29	7.26	ABCC	ABC transporter C family member 8	TMD-NBD-TMD-NBD
Glyma.08G194600	15681255	15689134	Chr08	1	11	1465	164.05	7.72	ABCC	ABC transporter C family member 8-like	TMD-NBD-TMD-NBD
Glyma.08G194700	15691570	15698320	Chr08	1	10	1498	167.57	8.1	ABCC	ABC transporter C family member 8-like isoform X1	TMD-NBD-TMD-NBD
Glyma.08G201300	16293501	16303097	Chr08	-1	21	1482	167.79	8.02	ABCG	ABC transporter G family member 36-like	NBD-TMD-NBD-TMD
Glyma.08G270300	34962273	34982702	Chr08	1	11	1254	137.52	8.24	ABCB	ABC transporter B family member 2-like	TMD-NBD-TMD-NBD
Glyma.08G326200	44435855	44442475	Chr08	-1	9	1493	167.02	7.83	ABCC	ABC transporter C family member 3-like isoform X1	TMD-NBD-TMD-NBD
Glyma.08G326300	44444895	44448755	Chr08	-1	0	171	19.23	10.53	ABCC	ABC transporter C family member 3-like isoform X1	TMD-NBD
Glyma.08G326500	44454674	44463977	Chr08	1	9	1503	167.71	7.43	ABCC	ABC transporter C family member 3-like	TMD-NBD-TMD-NBD
Glyma.08G326600	44469463	44476189	Chr08	-1	9	1496	166.36	7.04	ABCC	ABC transporter C family member 3-like	TMD-NBD-TMD-NBD
Glyma.08G332100	44947629	44951967	Chr08	1	8	489	55.62	8.55	ABCG	ABC transporter G family member 26-like	NBD-TMD
Glyma.08G342600	45812451	45820040	Chr08	1	6	1259	137.26	8.34	ABCB	ABC transporter B family member 15-like	TMD-NBD-TMD-NBD
Glyma.08G347000	46169140	46174873	Chr08	1	10	1474	164.85	6.19	ABCC	ABC transporter C family member 3	TMD-NBD-TMD-NBD
Glyma.09G044500	3801066	3811353	Chr09	-1	10	1506	168.46	7.51	ABCC	ABC transporter C family member 14-like	TMD-NBD-TMD-NBD
Glyma.09G074700	8100491	8105843	Chr09	1	6	623	70.11	7.18	ABCG	ABC transporter G family member 21-like	NBD-TMD
Glyma.09G147400	36545553	36552800	Chr09	1	15	710	77.69	9.28	ABCB	ABC transporter B family member 28	TMD-NBD
Glyma.09G160000	38399616	38405894	Chr09	-1	9	707	78.75	8.84	ABCG	ABC transporter G family member 11	NBD-TMD
Glyma.09G202400	42649734	42653364	Chr09	-1	2	730	81.79	9.38	ABCG	ABC transporter G family member 6-like	NBD-TMD
Glyma.09G206300	43035752	43044159	Chr09	-1	10	1245	136.3	8.69	ABCB	ABC transporter B family member 2-like	TMD-NBD-TMD-NBD
Glyma.09G251900	47224465	47229507	Chr09	-1	9	345	37.72	8.01	ABCI	Trigalactosyldiacylglycerol chloroplastic	NBD
Glyma.10G019000	1633934	1642898	Chr10	-1	10	1501	167.7	8.25	ABCC	ABC transporter C family member 4-like	TMD-NBD-TMD-NBD
Glyma.10G055000	5005812	5012941	Chr10	1	9	1343	147.31	8.19	ABCB	ABC transporter B family member 1	TMD-NBD-TMD-NBD
Glyma.10G057700	5269689	5281172	Chr10	1	13	1099	122.28	8.81	ABCG	White-brown complex homolog 30	NBD-TMD
Glyma.10G073800	7639982	7645813	Chr10	1	9	605	66.58	9.84	ABCB	ABC transporter B family member chloroplastic	TMD-NBD
Glyma.10G086800	11176581	11187955	Chr10	-1	9	778	86.28	8.85	ABCG	ABC transporter G family member 22-like isoform X1	NBD-TMD
Glyma.10G137600	37138233	37143916	Chr10	1	11	1282	138.6	6.49	ABCB	ABC transporter B family member 21-like	TMD-NBD-TMD-NBD
Glyma.10G145200	38005279	38008462	Chr10	-1	6	333	37.12	9.92	ABCI	ABC transporter I family member 20	NBD
Glyma.10G203000	43416046	43425957	Chr10	-1	15	1208	137.47	6.83	ABCG	Pleiotropic drug resistance 2	NBD-TMD-NBD-TMD
Glyma.10G205600	43735279	43740262	Chr10	1	4	684	76.03	9.02	ABCG	ABC transporter G family member 21-like	NBD-TMD
Glyma.10G209200	44125282	44131953	Chr10	1	13	1116	123.85	9.18	ABCG	ABC transporter G family member 24-like	NBD-TMD
Glyma.10G217300	44899066	44906371	Chr10	1	2	669	74	9.68	ABCG	ABC transporter G family member 25	NBD-TMD
Glyma.10G227300	45777447	45785455	Chr10	1	10	1483	166.49	7.76	ABCC	ABC transporter C family member 10-like	TMD-NBD-TMD-NBD
Glyma.10G227400	45788910	45796345	Chr10	1	10	1479	166.04	7.37	ABCC	ABC transporter C family member 10-like	TMD-NBD-TMD-NBD
Glyma.10G229800	45996215	45998100	Chr10	1	1	543	60.95	9.65	ABCG	ABC transporter G family member 8	NBD-TMD
Glyma.10G264900	48891314	48899123	Chr10	1	10	725	79.42	8.05	ABCG	ABC transporter G family member 7	NBD-TMD
Glyma.10G290800	50873788	50883828	Chr10	-1	10	1399	155.21	6.39	ABCB	ABC transporter B family member 20	TMD-NBD-TMD-NBD
Glyma.11G042400	3107428	3109228	Chr11	-1	2	456	50.38	6.41	ABCI	Chloroplastic,Protein ABCI7	CYT domain
Glyma.11G090200	6841310	6844842	Chr11	1	4	660	74.24	8.31	ABCG	ABC transporter G family member 14	NBD-TMD
Glyma.11G090900	6874416	6879692	Chr11	1	10	606	68.39	7.75	ABCE	ABC transporter E family member 2	NBD-NBD
Glyma.11G093800	7116433	7123292	Chr11	-1	8	692	77.34	9.32	ABCG	ABC transporter G family member 15-like	NBD-TMD
Glyma.11G093900	7130214	7137304	Chr11	-1	8	699	78	9.26	ABCG	ABC transporter G family member 15-like	NBD-TMD
Glyma.11G194700	26841569	26845252	Chr11	1	4	595	66.38	6.7	ABCF	ABC transporter F family member 1	NBD-NBD
Glyma.11G196100	27006535	27013178	Chr11	1	13	1098	121.45	9.08	ABCG	ABC transporter G family member 28-like	NBD-TMD
Glyma.11G239800	33426769	33439567	Chr11	1	24	1337	150.57	9.08	ABCD	ABC transporter D family member 1	TMD-NBD-TMD-NBD
Glyma.12G020300	1432397	1439459	Chr12	-1	8	688	76.88	9.07	ABCG	ABC transporter G family member 15-like	NBD-TMD
Glyma.12G020400	1445666	1452363	Chr12	-1	8	695	77.45	8.98	ABCG	ABC transporter G family member 15-like	NBD-TMD
Glyma.12G078000	6072988	6079965	Chr12	-1	13	1091	120.59	9.24	ABCG	ABC transporter G family member 28-like	NBD-TMD
Glyma.12G079400	6199393	6204133	Chr12	-1	4	594	66.35	6.7	ABCF	ABC transporter F family member 1	NBD-NBD
Glyma.12G135300	15721275	15728379	Chr12	1	6	1248	137.17	8.83	ABCB	Multidrug resistance	TMD-NBD-TMD-NBD
Glyma.12G177200	33585915	33592657	Chr12	1	10	724	80.53	8.69	ABCG	ABC transporter G family member 3	NBD-TMD
Glyma.12G177500	33617421	33621343	Chr12	-1	4	595	66.68	6.52	ABCF	ABC transporter F family member 1-like	NBD-NBD
Glyma.12G228500	38851349	38853467	Chr12	1	0	610	68.38	8.86	ABCG	ABC transporter G family member 10	NBD-TMD
Glyma.13G002500	679621	689637	Chr13	-1	16	712	79.33	6.48	ABCF	ABC transporter F family member 3	NBD-NBD
Glyma.13G042900	13610900	13619324	Chr13	1	8	686	76.57	8.71	ABCG	ABC transporter G family member 11-like	NBD-TMD
Glyma.13G043000	13631954	13636186	Chr13	1	7	676	75.27	7.8	ABCG	ABC transporter G family member 11-like	NBD-TMD
Glyma.13G043100	13638423	13642264	Chr13	-1	8	480	53.34	7.22	ABCG	ABC transporter G family member 11	NBD-TMD
Glyma.13G043500	13674949	13686040	Chr13	-1	8	635	69.8	7.4	ABCG	ABC transporter G family member 11	NBD-TMD
Glyma.13G043600	13695151	13698734	Chr13	-1	7	689	76.18	8.58	ABCG	ABC transporter G family member 11	NBD-TMD
Glyma.13G043800	13707907	13714137	Chr13	-1	7	693	76.93	8.41	ABCG	ABC transporter G family member 11-like	NBD-TMD
Glyma.13G044000	13734229	13739813	Chr13	-1	7	659	73.33	8.06	ABCG	ABC transporter G family member 11-like	NBD-TMD
Glyma.13G063700	16246277	16254831	Chr13	1	9	1249	136.13	8.12	ABCB	ABC transporter B family member 19	TMD-NBD-TMD-NBD
Glyma.13G074600	17715730	17720618	Chr13	1	4	383	41.63	6.77	ABCI	Trigalactosyldiacylglycerol chloroplastic	MlaD
Glyma.13G118500	23126352	23132115	Chr13	-1	10	1265	137.14	6.92	ABCB	ABC transporter B family member 4-like	TMD-NBD-TMD-NBD
Glyma.13G118600	23138789	23145770	Chr13	-1	13	1206	130.43	7.8	ABCB	ABC transporter B family member 11-related	TMD-NBD-TMD-NBD
Glyma.13G118800	23151486	23158259	Chr13	-1	11	1271	136.65	7.2	ABCB	ABC transporter B family member 11	TMD-NBD-TMD-NBD
Glyma.13G118900	23165832	23171431	Chr13	-1	11	1267	137.07	7.22	ABCB	ABC transporter B family member 11	TMD-NBD-TMD-NBD
Glyma.13G119000	23173905	23180011	Chr13	-1	11	1274	137.8	6.67	ABCB	ABC transporter B family member 11-like	TMD-NBD-TMD-NBD
Glyma.13G124700	23809688	23813820	Chr13	1	5	296	32.82	6.1	ABCI	ABC transporter I family member 19	NBD
Glyma.13G127500	24041356	24050612	Chr13	-1	10	1517	168.36	6.83	ABCC	ABC transporter C family member 5-like	TMD-NBD-TMD-NBD
Glyma.13G142100	25466346	25473709	Chr13	1	9	1341	146.94	7.31	ABCB	ABC transporter B family member 1	TMD-NBD-TMD-NBD
Glyma.13G144500	25710954	25722332	Chr13	1	13	922	102.02	9.31	ABCG	White-brown complex homolog 30	NBD-TMD
Glyma.13G154800	27026082	27030891	Chr13	1	0	228	25.78	10.06	ABCI	ABC transporter I family member 1	NBD
Glyma.13G158600	27380434	27383381	Chr13	-1	0	720	79.98	6.04	ABCF	ABC transporter F family member 4	NBD-NBD
Glyma.13G163700	27895777	27898359	Chr13	-1	1	544	60.61	6.52	ABCI	UPF0051 chloroplastic-like,Protein ABCI8	CYT domain
Glyma.13G183400	29666942	29670201	Chr13	1	3	629	70.5	8.99	ABCG	ABC transporter G family member 9-like	NBD-TMD
Glyma.13G220000	33313732	33336740	Chr13	1	26	1620	181.88	6.57	ABCC	ABC transporter C family member 2-like	TMD-NBD-TMD-NBD
Glyma.13G222000	33493674	33499351	Chr13	-1	11	1261	136.07	7.7	ABCB	ABC transporter B family member 9-like	TMD-NBD-TMD-NBD
Glyma.13G271300	37333350	37335248	Chr13	-1	0	611	68.84	8.8	ABCG	ABC transporter G family member 10	NBD-TMD
Glyma.13G279800	38113704	38117785	Chr13	1	3	627	70.1	9.06	ABCG	ABC transporter G family member 9	NBD-TMD
Glyma.13G323200	41774766	41779037	Chr13	1	4	593	66.45	6.52	ABCF	ABC transporter F family member 1-like	NBD-NBD
Glyma.13G323500	41799767	41806286	Chr13	-1	10	724	80.48	8.68	ABCG	ABC transporter G family member 3	NBD-TMD
Glyma.13G355000	44358072	44369101	Chr13	-1	21	1487	168.29	8.5	ABCG	ABC transporter G family member 36	NBD-TMD-NBD-TMD
Glyma.13G361800	44866362	44867785	Chr13	1	7	215	24.65	6.5	ABCG	Pleiotropic drug resistance 1-like	NBD-TMD
Glyma.13G361900	44868834	44874288	Chr13	-1	19	1426	160.96	7.8	ABCG	Pleiotropic drug resistance 1	NBD-TMD-NBD-TMD
Glyma.13G362000	44877689	44885061	Chr13	-1	25	1189	134.3	8.13	ABCG	Plant PDR ABC transporter associated	NBD-TMD-NBD-TMD
Glyma.13G370300	45575500	45592485	Chr13	-1	35	1468	163.81	6.63	ABCC	ABC transporter C family member 13 isoform X1	TMD-NBD-TMD-NBD
Glyma.14G012000	906742	910432	Chr14	-1	8	686	77.61	8.13	ABCG	ABC transporter G family member 26-like	NBD-TMD
Glyma.14G015300	1100698	1107404	Chr14	1	9	1494	166.66	6.89	ABCC	ABC transporter C family member 3-like	TMD-NBD-TMD-NBD
Glyma.14G040300	3021766	3024850	Chr14	1	4	383	42.32	9.81	ABCI	Trigalactosyldiacylglycerol chloroplastic-like	MlaD
Glyma.14G127800	20497307	20506129	Chr14	1	23	1263	142.64	8.39	ABCG	Pleiotropic drug resistance 1	NBD-TMD-NBD-TMD
Glyma.14G193300	45799781	45810995	Chr14	1	23	1440	161.73	9.1	ABCG	ABC transporter G family member 31-like	NBD-TMD-NBD-TMD
Glyma.14G207200	47290893	47309462	Chr14	-1	19	750	81.6	9.84	ABCB	ABC transporter B family member mitochondrial	TMD-NBD
Glyma.14G220200	48521772	48527279	Chr14	1	9	1250	135.47	7.11	ABCB	ABC transporter B family member 13-like	TMD-NBD-TMD-NBD
Glyma.15G011800	903819	911563	Chr15	1	23	1512	171.01	7.16	ABCG	Pleiotropic drug resistance 1-like isoform X1	NBD-TMD-NBD-TMD
Glyma.15G011900	914542	921313	Chr15	1	19	1426	160.74	7.36	ABCG	Pleiotropic drug resistance 1	NBD-TMD-NBD-TMD
Glyma.15G012000	936268	944374	Chr15	1	19	1427	160.81	6.97	ABCG	Pleiotropic drug resistance 1-like	NBD-TMD-NBD-TMD
Glyma.15G019200	1468479	1479115	Chr15	1	19	1284	145.4	7.53	ABCG	ABC transporter G family member 36	NBD-TMD-NBD-TMD
Glyma.15G090200	6938882	6944456	Chr15	-1	12	1247	134.33	8.19	ABCB	ABC transporter B family member 9-like	TMD-NBD-TMD-NBD
Glyma.15G092400	7119377	7140384	Chr15	-1	26	1620	181.63	6.61	ABCC	ABC transporter C family member 2-like	TMD-NBD-TMD-NBD
Glyma.15G148500	12216661	12226663	Chr15	1	10	1501	167.59	8.21	ABCC	ABC transporter C family member 14-like	TMD-NBD-TMD-NBD
Glyma.15G149900	12376028	12378637	Chr15	1	2	123	13.57	10.48	ABCC	ABC transporter C family member 4-like	TMD-NBD
Glyma.15G217000	35755170	35755938	Chr15	1	1	84	9.66	4.41	ABCI	UPF0051 chloroplastic, PROTEIN ABCI8	CYT domain
Glyma.15G240400	45549932	45550234	Chr15	-1	0	100	10.83	9.89	ABCG	Pleiotropic drug resistance 1-like	NBD-TMD
Glyma.15G241000	45743394	45744067	Chr15	-1	1	198	22.33	9.86	ABCC	ABC transporter C family member 8	TMD-NBD
Glyma.16G011000	950705	958898	Chr16	-1	8	1515	166.56	7.89	ABCB	ABC transporter B family member 19-like	TMD-NBD-TMD-NBD
Glyma.16G071000	7097619	7123157	Chr16	-1	17	674	74.95	8.03	ABCB	ABC transporter B family member chloroplastic-like isoform X2	TMD-NBD
Glyma.16G076900	7862192	7865895	Chr16	-1	4	656	73.25	8.76	ABCG	ABC transporter G family member 14-like	NBD-TMD
Glyma.16G078100	8039740	8049917	Chr16	-1	8	1237	135.62	9.1	ABCB	ABC transporter B family member 8	TMD-NBD-TMD-NBD
Glyma.16G110100	23992769	23996459	Chr16	-1	4	651	73.06	9.04	ABCG	ABC transporter G family member 14-like	NBD-TMD
Glyma.16G125700	27644996	27645293	Chr16	-1	1	67	7.72	8.92	ABCG	Pleiotropic drug resistance 1	NBD-TMD
Glyma.16G172400	33313788	33319758	Chr16	1	11	1480	166.8	7.54	ABCC	ABC transporter C family member 10-like isoform X2	TMD-NBD-TMD-NBD
Glyma.16G172500	33323823	33329728	Chr16	1	11	1448	162.95	7.79	ABCC	ABC transporter C family member 10-like isoform X1	TMD-NBD-TMD-NBD
Glyma.16G172600	33333664	33344521	Chr16	-1	10	1493	168.3	7.61	ABCC	ABC transporter C family member 10-like isoform X1	TMD-NBD-TMD-NBD
Glyma.16G209400	36871978	36878151	Chr16	-1	9	706	78.6	8.84	ABCG	ABC transporter G family member 11	NBD-TMD
Glyma.17G039200	2909988	2919347	Chr17	1	22	1435	162.22	8.23	ABCG	Pleiotropic drug resistance 3-like isoform X2	NBD-TMD-NBD-TMD
Glyma.17G039300	2918657	2932426	Chr17	-1	23	1452	163.68	8.03	ABCG	Pleiotropic drug resistance 3	NBD-TMD-NBD-TMD
Glyma.17G041200	3041792	3047638	Chr17	1	11	1275	137.4	6.83	ABCB	ABC transporter B family member 11-like	TMD-NBD-TMD-NBD
Glyma.17G041300	3066546	3073337	Chr17	1	11	1303	140.78	6.44	ABCB	ABC transporter B family member 4-like	TMD-NBD-TMD-NBD
Glyma.17G041400	3076764	3083449	Chr17	1	11	1266	137.11	6.71	ABCB	ABC transporter B family member 11	TMD-NBD-TMD-NBD
Glyma.17G080400	6225290	6232361	Chr17	-1	16	633	68.46	9.12	ABCB	ABC transporter B family member 25	TMD-NBD
Glyma.17G098300	7744247	7753347	Chr17	1	17	954	106.49	7.58	ABCA	ABC transporter A family member 7-like isoform X2	TMD-NBD
Glyma.17G107200	8416908	8419317	Chr17	1	1	530	58.8	5.82	ABCI	UPF0051 chloroplastic-like,protein ABCI8	CYT domain
Glyma.17G112700	8895386	8898371	Chr17	1	0	721	80.09	5.93	ABCF	ABC transporter F family member 4	NBD-NBD
Glyma.17G120100	9514657	9525943	Chr17	-1	23	1418	161.91	8.81	ABCG	ABC transporter G family member 32	NBD-TMD-NBD-TMD
Glyma.17G206100	33612472	33622199	Chr17	-1	20	1260	142.18	7	ABCG	Pleiotropic drug resistance 1-like	NBD-TMD-NBD-TMD
Glyma.17G206300	33730503	33738647	Chr17	-1	24	1447	164.32	8.26	ABCG	Pleiotropic drug resistance 1	NBD-TMD-NBD-TMD
Glyma.17G259100	41325677	41331177	Chr17	1	9	1250	135.68	7.65	ABCB	ABC transporter B family member 13-like	TMD-NBD-TMD-NBD
Glyma.18G012700	902757	907836	Chr18	1	7	1247	136.77	8.8	ABCB	Multidrug resistance	TMD-NBD-TMD-NBD
Glyma.18G017600	1248018	1259605	Chr18	-1	23	1316	147.46	9.12	ABCD	ABC transporter D family member 1-like	TMD-NBD-TMD-NBD
Glyma.18G063400	5796259	5805903	Chr18	-1	23	1430	160.33	9.07	ABCG	ABC transporter G family member 31-like	NBD-TMD-NBD-TMD
Glyma.18G074800	7088533	7092750	Chr18	-1	8	682	77.36	9.5	ABCG	ABC transporter G family member 26-like	NBD-TMD
Glyma.18G079600	7636002	7639927	Chr18	1	2	874	97.53	8.06	ABCC	ABC transporter C family member 3-like isoform X1	TMD-NBD
Glyma.18G079700	7640458	7642875	Chr18	1	5	337	37.7	5.06	ABCC	ABC transporter C family member 3-like isoform X1	TMD-NBD
Glyma.18G080900	7767322	7773702	Chr18	1	9	1301	145.02	6.92	ABCC	ABC transporter C family member 3-like isoform X1	TMD-NBD-TMD-NBD
Glyma.18G094000	9564902	9568203	Chr18	1	4	536	59.81	8.42	ABCC	ABC transporter C family member 3	TMD-NBD
Glyma.18G154200	31086388	31094588	Chr18	-1	6	1275	138.77	7.99	ABCB	ABC transporter B family member 15-like	TMD-NBD-TMD-NBD
Glyma.18G158400	35321846	35328427	Chr18	1	9	1488	166.47	6.68	ABCC	ABC transporter C family member 3-like	TMD-NBD-TMD-NBD
Glyma.18G179000	43119526	43120418	Chr18	-1	2	133	13.99	8.03	ABCB	ABC transporter B family member 21	TMD-NBD
Glyma.18G240700	52934180	52940094	Chr18	1	10	395	43.18	7.88	ABCI	Trigalactosyldiacylglycerol chloroplastic	NBD
Glyma.18G263200	54852891	54861158	Chr18	1	9	1306	145.85	5.54	ABCC	ABC transporter C family member 3-like isoform X1	TMD-NBD-TMD-NBD
Glyma.18G286600	56680605	56690072	Chr18	1	10	1402	155.29	6.45	ABCB	ABC transporter B family member 20-like	TMD-NBD-TMD-NBD
Glyma.19G016400	1631472	1639538	Chr19	-1	6	1248	136.26	8.33	ABCB	ABC transporter B family member 15-like	TMD-NBD-TMD-NBD
Glyma.19G016600	1691306	1698584	Chr19	-1	6	1259	138.94	8.74	ABCB	ABC transporter B family member 15	TMD-NBD-TMD-NBD
Glyma.19G016700	1728554	1736171	Chr19	-1	6	1249	138.27	8.5	ABCB	ABC transporter B family member 15	TMD-NBD-TMD-NBD
Glyma.19G021500	2352336	2362829	Chr19	-1	9	1250	136.23	8.12	ABCB	ABC transporter B family member 19	TMD-NBD-TMD-NBD
Glyma.19G094500	33429146	33447072	Chr19	1	7	261	29.08	9.9	ABCI	ABC transporter I family member chloroplastic isoform X1	NBD
Glyma.19G137700	39904075	39916887	Chr19	1	19	1121	125.07	8.18	ABCG	ABC transporter G family member 15-like	NBD-TMD-NBD
Glyma.19G169000	42961519	42970330	Chr19	-1	10	1537	170.58	7.27	ABCC	ABC transporter C family member 5-like	TMD-NBD-TMD-NBD
Glyma.19G169200	42988361	43001004	Chr19	-1	9	1611	181.38	8.78	ABCG	Pleiotropic drug resistance 1	NBD-TMD-NBD-TMD
Glyma.19G169300	43008455	43010658	Chr19	-1	9	376	41.63	6.61	ABCG	Drug resistance transporter-like ABC domain	TMD-NBD
Glyma.19G169400	43013724	43021681	Chr19	-1	22	1430	161.55	9.17	ABCG	Pleiotropic drug resistance 1-like	NBD-TMD-NBD-TMD
Glyma.19G176000	43596780	43600042	Chr19	1	0	736	81.98	9.51	ABCG	ABC transporter G family member 20	NBD-TMD
Glyma.19G184300	44282172	44289331	Chr19	-1	9	1339	146.34	7.68	ABCB	ABC transporter B family member 1	TMD-NBD-TMD-NBD
Glyma.19G192900	45069470	45077982	Chr19	-1	19	1454	164.78	7.34	ABCG	ABC transporter G family member 39-like isoform X1	NBD-TMD-NBD-TMD
Glyma.19G202200	45905991	45914897	Chr19	-1	9	736	81.2	9.09	ABCG	ABC transporter G family member 22 isoform X1	NBD-TMD
Glyma.19G210700	46478152	46484735	Chr19	1	10	1504	169.79	7.7	ABCC	ABC transporter C family member 4-like	TMD-NBD-TMD-NBD
Glyma.19G210800	46487714	46489905	Chr19	1	0	187	21.44	6.27	ABCC	ABC transporter C family member 4-like	TMD-NBD
Glyma.20G040400	7144305	7146473	Chr20	1	0	656	73.88	7.84	ABCG	ABC transporter G family member 23	NBD-TMD
Glyma.20G048400	9299436	9305064	Chr20	1	4	383	41.89	8.8	ABCI	Trigalactosyldiacylglycerol chloroplastic-like	MlaD
Glyma.20G052300	11822430	11825594	Chr20	1	9	490	54.06	8.92	ABCG	ABC transporter G family member 3	NBD-TMD
Glyma.20G066600	23659307	23670263	Chr20	1	16	712	79.34	6.31	ABCF	ABC transporter F family member 3	NBD-NBD
Glyma.20G125600	36779457	36786706	Chr20	-1	10	715	78.23	8.42	ABCG	ABC transporter G family member 7	NBD-TMD
Glyma.20G163500	40103550	40105350	Chr20	-1	1	571	63.59	9.78	ABCG	ABC transporter G family member 8	NBD-TMD
Glyma.20G165000	40235651	40242643	Chr20	-1	10	1240	139.11	7.88	ABCC	ABC transporter C family member 10-like	TMD-NBD-TMD-NBD
Glyma.20G174800	41213657	41221454	Chr20	-1	2	670	73.95	9.78	ABCG	ABC transporter G family member 25	NBD-TMD
Glyma.20G181400	41937595	41946126	Chr20	-1	13	1115	123.44	9.13	ABCG	ABC transporter G family member 24-like	NBD-TMD
Glyma.20G184900	42292639	42297116	Chr20	-1	4	682	75.9	8.5	ABCG	ABC transporter G family member 21-like	NBD-TMD
Glyma.20G187400	42597396	42610173	Chr20	1	19	1474	167.39	6.77	ABCG	Pleiotropic drug resistance 2-like isoform X1	NBD-TMD-NBD-TMD
Glyma.20G239800	47121473	47131648	Chr20	-1	10	1399	155.21	6.42	ABCB	ABC transporter B family member 20	TMD-NBD-TMD-NBD
Glyma.20G242000	47291648	47294556	Chr20	1	0	750	83.14	9.29	ABCG	ABC transporter G family member 6-like	NBD-TMD
Glyma.U001700	870	5014	scaffold 1118	1	9	491	55.78	8.65	ABCA	ABC transporter A family member 7	TMD-NBD
