# Supplementary material for: In Silico Genome-Wide Analysis of the ATP-Binding Cassette Transporter Gene Family in Soybean (Glycine max L.) and Their Expression Profiling
Source: Biomed Res Int. 2019 Jan 10;2019:8150523. doi: 10.1155/2019/8150523 (PMC6350567; doi:10.1155/2019/8150523)
Supplement: Supplementary 5 — TABLE S2: The ratio of Ka/Ks and distribution of duplicated soybean ABC transporter genes in respective blocks as obtained from Plant Genome Duplication Database (PGDD). [file 8150523.f5.xls]

## Sheet: Sheet1
TABLE S2. List of 69 tandemly GmABCs repeated gene and array are shown in specific highlighted color.
Chrom 2
Glyma.02G298300
Glyma.02G298400
Glyma.02G298500
Chr03
Glyma.03G135200
Glyma.03G135300
Glyma.03G167800
Glyma.03G168000
Glyma.03G168100
Glyma.03G168200
Glyma.03G192500
Glyma.03G192600
Glyma.03G192700
Glyma.03G192800
Chr04
Glyma.04G172900
Glyma.04G173000
Chr06
Glyma.06G191300
Glyma.06G191400
Chr07
Glyma.07G011500
Glyma.07G011600
Glyma.07G233900
Glyma.07G234000
Chr08
Glyma.08G070700
Glyma.08G070800
Glyma.08G070900
Glyma.08G071000
Glyma.08G071100
Glyma.08G071200
Glyma.08G101500
Glyma.08G101700
Glyma.08G194600
Glyma.08G194700
Glyma.08G326200
Glyma.08G326300
Glyma.08G326500
Glyma.08G326600
Chr10
Glyma.10G227300
Glyma.10G227400
Chr11
Glyma.11G093800
Glyma.11G093900
Chr12
Glyma.12G020300
Glyma.12G020400
Chr13
Glyma.13G042900
Glyma.13G043000
Glyma.13G118500
Glyma.13G118600
Glyma.13G118800
Glyma.13G118900
Glyma.13G119000
Glyma.13G361800
Glyma.13G361900
Glyma.13G362000
Chr15
Glyma.15G011800
Glyma.15G011900
Chr16
Glyma.16G172400
Glyma.16G172500
Glyma.16G172600
Chr17
Glyma.17G039200
Glyma.17G039300
Glyma.17G041200
Glyma.17G041300
Glyma.17G041400
Glyma.17G206100
Glyma.17G206300
Chr18
Glyma.18G079600
Glyma.18G079700
Chr19
Glyma.19G016600
Glyma.19G016700
Glyma.19G169300
Glyma.19G169400
